# Supplementary material for: Seroepidemiology of Human Parvovirus B19 Infection among the Population of Vojvodina, Serbia, over a 16-Year Period (2008–2023)
Source: MDPI journal article supplement (doi:10.3390/v16020180), 2024-01-25
Supplement: s1 [file s1]

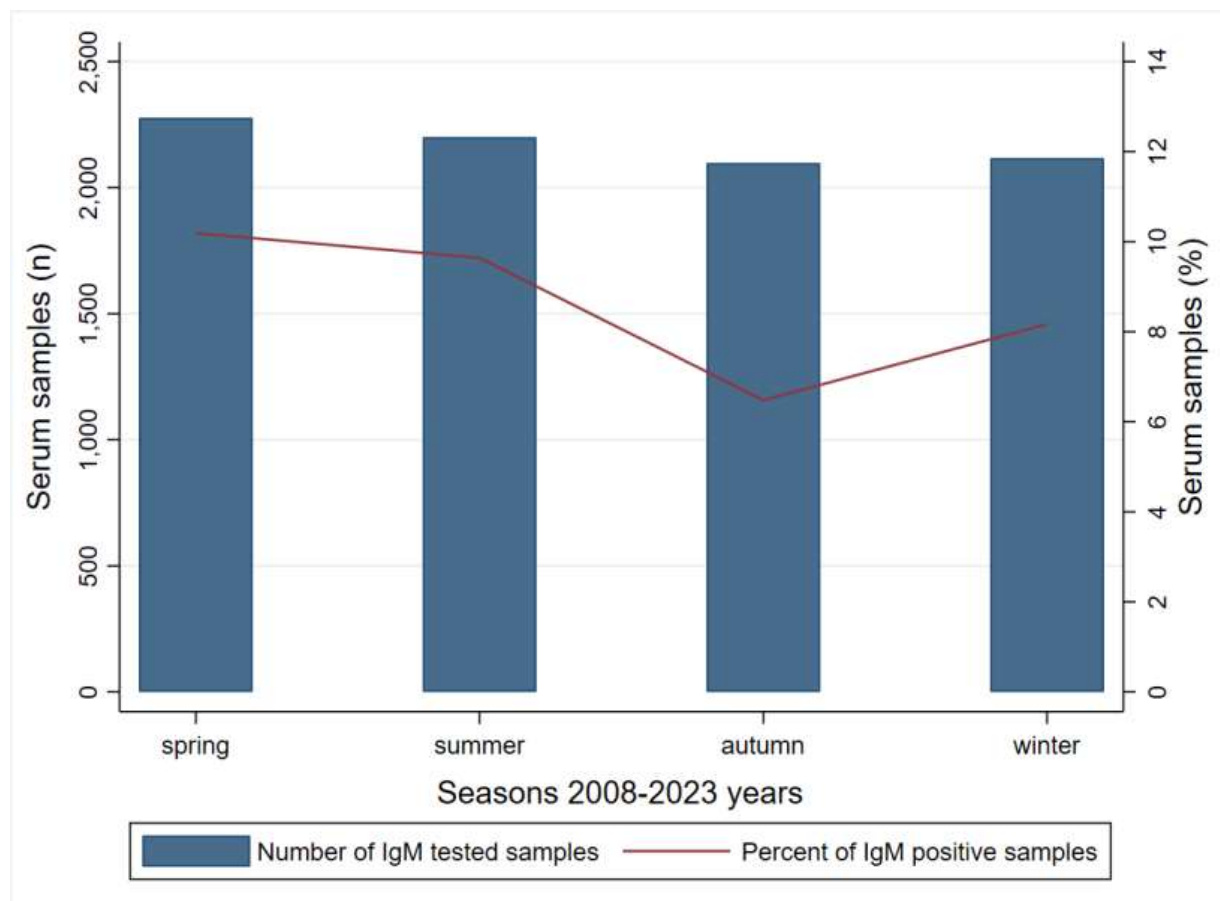

**Figure S1.** Number of tested samples and percent of positive PVB19 IgM samples across four meteorological seasons in Vojvodina, Serbia, 2008-2023.

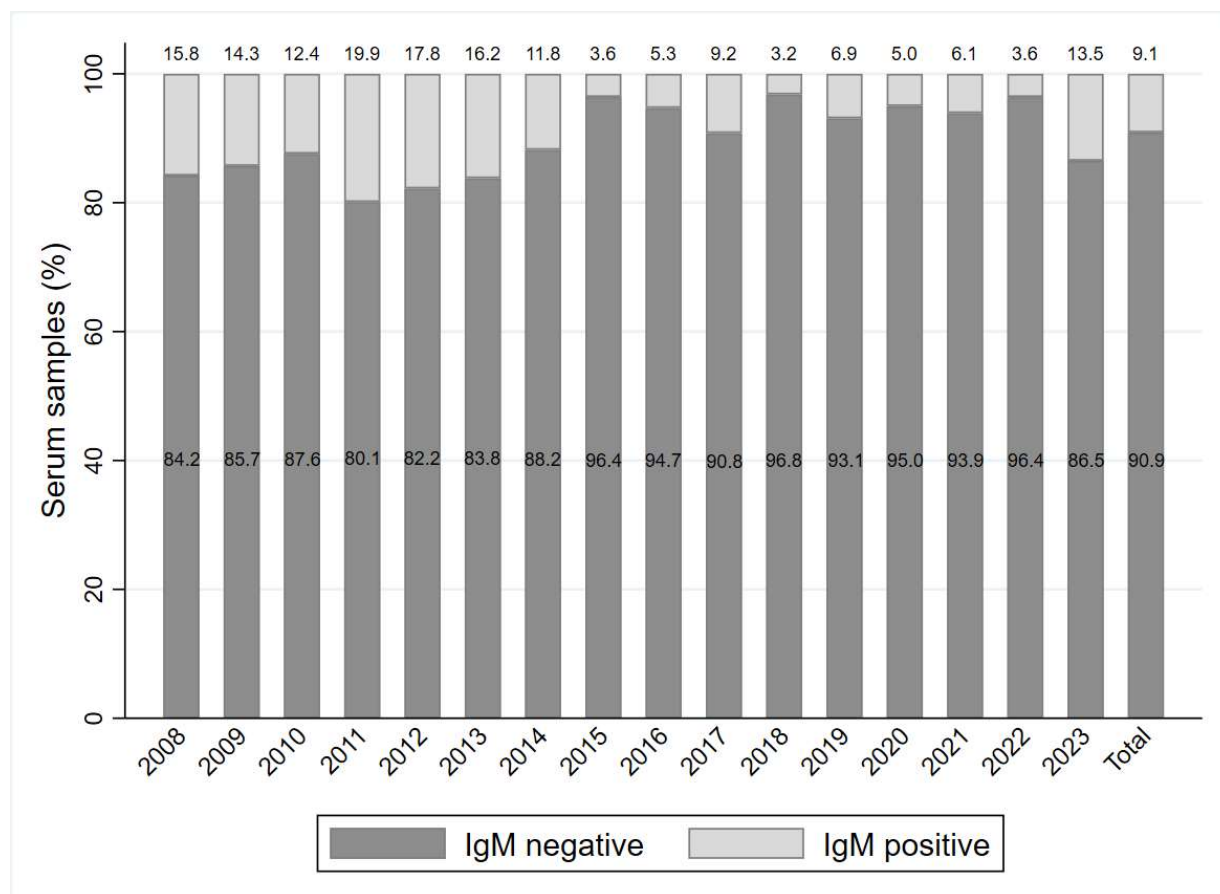

**Figure S2.** Percent of PVB19 IgM tested samples in Vojvodina, Serbia, 2008-2023.
